# Supplementary material for: Negative Survival Impact of Occult Lymph Node Involvement in Small HER2-Positive Early Breast Cancer Treated by Up-Front Surgery
Source: MDPI journal article supplement (doi:10.3390/cancers15184567), 2023-09-14
Supplement: s1 [file s1]

Table S1. Regression analyses for adjuvant chemotherapy in all patients.

| Adjuvant Chemotherapy |             | OR    | CI 95%     | p       |
|-----------------------|-------------|-------|------------|---------|
| Grade SBR             | 1           | 1     |            |         |
|                       | 2           |       |            | <0.0001 |
|                       | 3           |       |            | <0.0001 |
| Age groups            | <= 40       | 1     |            |         |
|                       | 40.1-50     | 0.498 | 0.28-0.89  | 0.019   |
|                       | 50.1-74.9   | 0.327 | 0.19-0.56  | <0.0001 |
|                       | >= 75       | 0.044 | 0.02-0.09  | <0.0001 |
| pT size groups        | < 20 mm     | 1     |            |         |
|                       | >= 20 mm    | 2.476 | 1.74-3.52  | <0.0001 |
| LVI                   | No          | 1     |            |         |
|                       | Yes         | 2.066 | 1.39-3.06  | <0.0001 |
|                       | Unknown     | 0.411 | 0.28-0.61  | <0.0001 |
| Subtype               | ER-negative | 1     |            |         |
|                       | ER-positive | 0.739 | 0.55-1.00  | 0.05    |
| pN status             | pN0         | 1     |            |         |
|                       | pN0(i+)     | 1.582 | 0.76-3.28  | 0.219   |
|                       | pN1mi       | 6.727 | 3.03-14.94 | <0.0001 |
|                       | pN1macro    | 4.657 | 3.04-7.13  | <0.0001 |

Table S2. Characteristics of patients with pT1a-b tumors according to adjuvant chemotherapy: univariate analyses.

| pT1a-b  |            | No Chemotherapy |      | Chemotherapy |      | Chi 2   |
|---------|------------|-----------------|------|--------------|------|---------|
|         |            | Nb              | %    | Nb           | %    | p       |
|         |            | 229             | 48.3 | 245          | 51.7 |         |
| Grade   | 1          | 50              | 21.8 | 12           | 4.9  | <0.0001 |
|         | 2          | 129             | 56.3 | 120          | 49.0 |         |
|         | 3          | 34              | 14.8 | 110          | 44.9 |         |
|         | unknown    | 16              | 7.0  | 3            | 1.2  |         |
| Age     | <= 40      | 11              | 4.8  | 33           | 13.5 | 0.007   |
|         | 40.1-50    | 50              | 21.8 | 54           | 22.0 |         |
|         | 50.1-74.9  | 153             | 66.8 | 149          | 60.8 |         |
|         | >= 75      | 15              | 6.6  | 9            | 3.7  |         |
| Subtype | ER-        | 72              | 31.4 | 119          | 48.6 | <0.0001 |
|         | ER+        | 157             | 68.6 | 126          | 51.4 |         |
| Surgery | BCS        | 174             | 76.0 | 176          | 71.8 | 0.098   |
|         | Mastectomy | 46              | 20.1 | 65           | 26.5 |         |
|         | unknown    | 9               | 3.9  | 4            | 1.6  |         |
| LVI     | No         | 163             | 71.2 | 176          | 71.8 | <0.0001 |
|         | Yes        | 7               | 3.1  | 43           | 17.6 |         |
|         | unknown    | 59              | 25.8 | 26           | 10.6 |         |
| pN      | pN0        | 218             | 95.2 | 208          | 84.9 | <0.0001 |
|         | pN0(i+) &  |                 |      |              |      |         |
|         | pN1mi      | 11              | 4.8  | 37           | 15.1 |         |

Table S3. Positive SN rates in the studies mentioned in the discussion

|                                                                                                     | ER-positive /<br>HER2-negative | ER-positive / HER2-<br>positive | ER-negative / HER2-<br>positive | triple-<br>negative |
|-----------------------------------------------------------------------------------------------------|--------------------------------|---------------------------------|---------------------------------|---------------------|
| Reyal <i>et al.</i> [33] (no<br>distinction between<br>pN0(i+), pN1mi and pN1-<br>macro-metastases) | 34.7%<br>(439/1,264)           | 31.6% (25/79)                   | 41.5% (22/53)                   | 20.4%<br>(30/147)   |
| SERC ITC                                                                                            | 5.5% (75/1354)                 | 6.67% (9/135)                   | 7.3% (3/41)                     | 8.2%<br>(8/97)      |
| SERC micro-metastases                                                                               | 27.5% (373/1354)               | 27.4% (37/135)                  | 24.4% (10/41)                   | 29.9%<br>(29/97)    |
| SERC macro-metastases                                                                               | 66.9% (906/1354)               | 65.9% (89/135)                  | 68.3% (28/41)                   | 61.8%<br>(60/97)    |
| Present study ITC                                                                                   |                                | 3% (39/1160)                    | 3% (21/610)                     |                     |
| Present study micro-<br>metastases                                                                  |                                | 7% (85/1160)                    | 5% (33/610)                     |                     |
| Present study macro-<br>metastases                                                                  |                                | 28% (321/1160)                  | 37% (225/610)                   |                     |

Table S4. lymphovascular invasion rates according to endocrine receptors (ER) status in the studies mentioned in the discussion

|                           | ER-positive / HER2-positive | ER-negative / HER2-positive |
|---------------------------|-----------------------------|-----------------------------|
| ESMO Open 2021 study [39] | 22% (3,279/14,655)          | 35% (926/2,667)             |
| Present study             | 35.2% (189/537)             | 32.3% (341/1,056)           |
